# Supplementary material for: Transcriptional profiling and functional characterization of the Hc-NHR-49 gene in ivermectin resistance of Haemonchus contortus
Source: Research Square preprint supplement (doi:10.21203/rs.3.rs-8472203/v1), 2026-01-14
Supplement: Supplementary file 1 [file beffc08e6d40b189c4cff5d3.docx]

Table S1 Primers of the *Hc-NHR-49* gene used for PCR and RT-qPCR in this study.

| Primer | Sequence | Experiment |
| --- | --- | --- |
| NHR-49-F | GCTCGGTACCCTCGAGATGGCATTAAGCAAAAAAAAAGT | Cloning of *Hc-NHR-49* |
| NHR-49-R | GCAGGTCGACAAGCTTTCATAATATTGTCATCACAGTGCT |
| qNHR-49-F | GGCAGTAGCCCAACAAAACG | *Hc-NHR-49* for RT-qPCR |
| qNHR-49-R | CTGATTCACCCGACGTTCCA |
| qGAPDH-49-F | GCAAAGACCCCGCTGAAATC |
| qGAPDH-49-R | TCGGCAGAAGGAGCAGAGAT |
| dsNHR-49-F | CGGGCCCCCCCTCGAGCGAGACCAATCAAGCGAACT | RNAi |
| dsNHR-49-R | ACCGCGGTGGCGGCCGCGTCGTCAAGGATGAACTCCGA |

Not: Restriction sites are underlined.
